# Endocrine-Disrupting Organotin Compounds Are Potent Inducers of Adipogenesis in Vertebrates

Felix Grün, Hajime Watanabe, Zamaneh Zamanian, Lauren Maeda, Kayo Arima, Ryan Cubacha, David M. Gardiner, Jun Kanno, Taisen Iguchi, and Bruce Blumberg

Department of Developmental and Cell Biology (F.G., Z.Z., L.M., K.A., R.C., D.M.G., B.B.), University of California Irvine, Irvine California 92697-2300; National Institutes of Natural Sciences (H.W., T.I.), National Institute for Basic Biology, Okazaki Institute for Integrative Bioscience, Okazaki 444-8787, Japan; and Division of Cellular & Molecular Toxicology (J.K.), Biological Safety Research Center, National Institute of Health Sciences, Setagaya-ku, Tokyo 158-8501, Japan

Dietary and xenobiotic compounds can disrupt endocrine signaling, particularly of steroid receptors and sexual differentiation. Evidence is also mounting that implicates environmental agents in the growing epidemic of obesity. Despite a long-standing interest in such compounds, their identity has remained elusive. Here we show that the persistent and ubiquitous environmental contaminant, tributyltin chloride (TBT), induces the differentiation of adipocytes *in vitro* and increases adipose mass *in vivo*. TBT is a dual, nanomolar affinity ligand for both the retinoid X receptor (RXR) and the peroxisome proliferator-activated receptor  $\gamma$  (PPAR $\gamma$ ). TBT promotes adipogenesis in the murine 3T3-L1 cell model and perturbs key regulators of adipo-

genesis and lipogenic pathways *in vivo*. Moreover, *in utero* exposure to TBT leads to strikingly elevated lipid accumulation in adipose depots, liver, and testis of neonate mice and results in increased epididymal adipose mass in adults. In the amphibian *Xenopus laevis*, ectopic adipocytes form in and around gonadal tissues after organotin, RXR, or PPAR $\gamma$  ligand exposure. TBT represents, to our knowledge, the first example of an environmental endocrine disrupter that promotes adipogenesis through RXR and PPAR $\gamma$  activation. Developmental or chronic lifetime exposure to organotins may therefore act as a chemical stressor for obesity and related disorders. (*Molecular Endocrinology* 20: 2141–2155, 2006)

ORGANOTINS ARE A diverse group of widely distributed environmental pollutants. Tributyltin chloride (TBT) and bis(triphenyltin) oxide (TPTO), have pleiotropic adverse effects on both invertebrate and vertebrate endocrine systems. Organotins were first used in the 1960s as antifouling agents in marine shipping paints, although such use has been restricted in recent years. Organotins persist as prevalent contaminants in dietary sources, such as fish and shellfish, and through pesticide use on high-value food crops (1, 2). Additional human exposure to organotins may occur through their use as antifungal agents in wood treatments, industrial water systems, and tex-

tiles. Mono- and diorganotins are prevalently used as stabilizers in the manufacture of polyolefin plastics (polyvinyl chloride), which introduces the potential for transfer by contact with drinking water and foods.

Exposure to organotins such as TBT and TPTO results in imposex, the abnormal induction of male sex characteristics in female gastropod mollusks (3, 4). Bioaccumulation of organotins decreases aromatase activity leading to a rise in testosterone levels that promotes development of male characteristics (5). Imposex results in impaired reproductive fitness or sterility in the affected animals and is one of the clearest examples of environmental endocrine disruption. TBT exposure also leads to masculinization of at least two fish species (6, 7), but TBT is only reported to have modest adverse effects on mammalian male and female reproductive tracts and does not alter sex ratios (8, 9). Instead, hepatic-, neuro-, and immunotoxicity appear to be the predominant effects of organotin exposure (10). Hence, the current mechanistic understanding of the endocrine-disrupting potential of organotins is based on their direct actions on the levels or activity of key steroid-regulatory enzymes such as aromatase and more general toxicity mediated via damage to mitochondrial functions and subsequent cellular stress responses (11–15).

However, it remains an open question whether *in vivo* organotins act primarily as protein and enzyme

## First Published Online April 13, 2006

Abbreviations: Acac, Acetyl-coenzyme A carboxylase; b.w., body weight; C/EBP, CCAAT/enhancer binding protein; 9-*cis* RA, 9-*cis* retinoic acid; DMSO, dimethylsulfoxide; F, forward; Fatp, fatty acid transport protein; LBD, ligand-binding domain; LXR, liver X receptor; MDIT, 3-isobutyl-1-methylxanthine, dexamethasone, insulin and T<sub>3</sub> adipocyte differentiation mix; PPAR, peroxisome proliferator-activated receptor; R, reverse; RAR, retinoic acid receptor; RXR, retinoid X receptor; Srebf1, sterol-regulatory element binding factor 1; TBT, tributyltin chloride; TPTO, triphenyltin oxide; TTNPB, (E)-4-[2-(5,6,7,8-tetrahydro-5,5,8,8-tetramethyl-2-naphthyl-1-propenyl)] benzoic acid; VDR, vitamin D receptor.

*Molecular Endocrinology* is published monthly by The Endocrine Society (<http://www.endo-society.org>), the foremost professional society serving the endocrine community.

inhibitors, or rather mediate their endocrine-disrupting effects at the transcriptional level. Recent work has shown that aromatase mRNA levels can be down-regulated in human ovarian granulosa cells by treatment with organotins or ligands for the nuclear hormone receptors, retinoid X receptor (RXRs) or peroxisome proliferator-activated receptor  $\gamma$  (PPAR $\gamma$ ) (16–18). Furthermore, Nishikawa *et al.* (19) have demonstrated that the gastropod *Thais clavigera* RXR homolog is responsive to 9-*cis*-retinoic acid (9-*cis*-RA) and TBT, and 9-*cis* RA can also induce imposex, suggesting a conserved transcriptional mechanism for TBT action across phyla. These ligand-dependent transcription factors belong to the nuclear hormone receptor superfamily—a group of approximately 150 members (48 human genes) that includes the estrogen receptor, androgen receptor, glucocorticoid receptor, thyroid hormone receptor, vitamin D receptor (VDR), retinoic acid receptors (RARs and RXRs), PPARs, and numerous orphan receptors. We were therefore intrigued by the similar effects of TBT and RXR/PPAR $\gamma$  ligands on mammalian aromatase mRNA expression and hypothesized that TBT might be exerting some of its biological effects via transcriptional regulation of gene expression through activation of one or more nuclear hormone receptors.

Our results show that organotins such as TBT are indeed potent and efficacious agonistic ligands of the vertebrate nuclear receptors, retinoid X receptors (RXRs) and PPAR $\gamma$ . The physiological consequences of receptor activation predict that permissive RXR heterodimer target genes and downstream signaling cascades are sensitive to organotin misregulation. Consistent with this prediction we observe that organotins phenocopy the effects of RXR and PPAR $\gamma$  ligands using *in vitro* and *in vivo* models of adipogenesis. Therefore, TBT and related organotin compounds are the first of a potentially new class of environmental endocrine disrupters that targets adipogenesis by modulating the activity of key regulatory transcription factors in the adipogenic pathway, RXR $\alpha$  and PPAR $\gamma$ . The existence of such xenobiotic compounds was previously hypothesized (20, 21). Our results suggest that developmental exposure to TBT and its congeners that activate RXR/PPAR $\gamma$  might be expected to increase the incidence of obesity in exposed individuals and that chronic lifetime exposure could act as a potential chemical stressor for obesity and obesity-related disorders.

## RESULTS

### Organotins Are Agonists of Vertebrate RXR and RXR-Permissive Heterodimers

Many known or suspected environmental endocrine-disrupting chemicals mimic natural lipophilic hormones that act through members of the superfamily of nuclear receptor transcription factors (22, 23). In a

screen of high-priority endocrine-disrupting chemicals against a bank of vertebrate nuclear receptor ligand-binding domains (LBDs), we observed that organotins, specifically tributyltin chloride (TBT) and bis(triphenyltin) oxide (TPTO), could fully activate an RXR $\alpha$  LBD construct (GAL4-RXR $\alpha$ ) in transient transfection assays. Both TBT and TPTO were as potent (EC<sub>50</sub> ~3–10 nM) as 9-*cis* retinoic acid, an endogenous RXR ligand and approximately 2- to 5-fold less potent than the synthetic RXR-specific ligands LG100268 (EC<sub>50</sub> ~ 2 nM) or AGN195203 (EC<sub>50</sub> ~ 0.5 nM) (Fig. 1A and see Table 2). Maximal activation for TBT reached the same levels as LG100268 or AGN195203.

We next tested whether activation by TBT was unique to RXR $\alpha$  only, restricted to RXR heterodimer complexes, or a general nuclear receptor transcriptional response (Fig. 1, B–D, and Table 1). TBT activated RXR $\alpha$  and RXR $\gamma$  from the amphibian *Xenopus laevis* in addition to human RXRs (Table 1). Our results are consistent with recent findings by Nishikawa *et al.* (19, 24) that organotins promote activation of all three human RXR subtypes in a yeast two-hybrid screen. We also observed significant activation of receptors typically considered to be permissive heterodimeric partners of RXR including human PPAR $\gamma$  (Fig. 1B, ~30% maximal activation of 10  $\mu$ M troglitazone, but note that activation is compromised by cellular toxicity above 100 nM), PPAR $\delta$ , liver X receptor (LXR), and the orphan receptor NURR1. In contrast, typical nonpermissive partners such as RARs, thyroid hormone receptor, and VDR failed to show activation by organotins (Fig. 1C and Table 1). Murine PPAR $\alpha$  was also not activated by TBT although it was fully activated by its specific synthetic agonist WY-14643 (Fig. 1D). The steroid and xenobiotic receptor was likewise unresponsive. The orphan receptor NURR1, which has no discernable ligand pocket and is believed to be ligand independent (25), was nevertheless activated 7- to 10-fold at 100 nM TBT. Similarly, other RXR-specific ligands, *e.g.* LG100268, activated NURR1 to the same degree, suggesting that this response occurred through NURR1's heterodimeric partner RXR as has been previously described (25, 26). Like other RXR-specific ligands, tributyltin was also able to promote the ligand-dependent recruitment of nuclear receptor cofactors such as receptor-associated coactivator 3 (ACTR), steroid receptor coactivator-1, and PPAR-binding protein in mammalian two-hybrid interaction assays (data not shown). We infer from these results that nuclear receptor activation by TBT activation is specific to a small subset of receptors and not a consequence of a general effect on the cellular transcriptional machinery.

We next investigated the relationship between the structure of the tin compounds and RXR activation by testing the response of GAL4-RXR $\alpha$  to mono-, di-, tri-, and tetra-substituted butyltin, branched side chains, variations in the alkyl chain length, and changes in the halide component (Fig. 1A and Table 2). Overall, trialkyltin compounds were the most effective with nano-

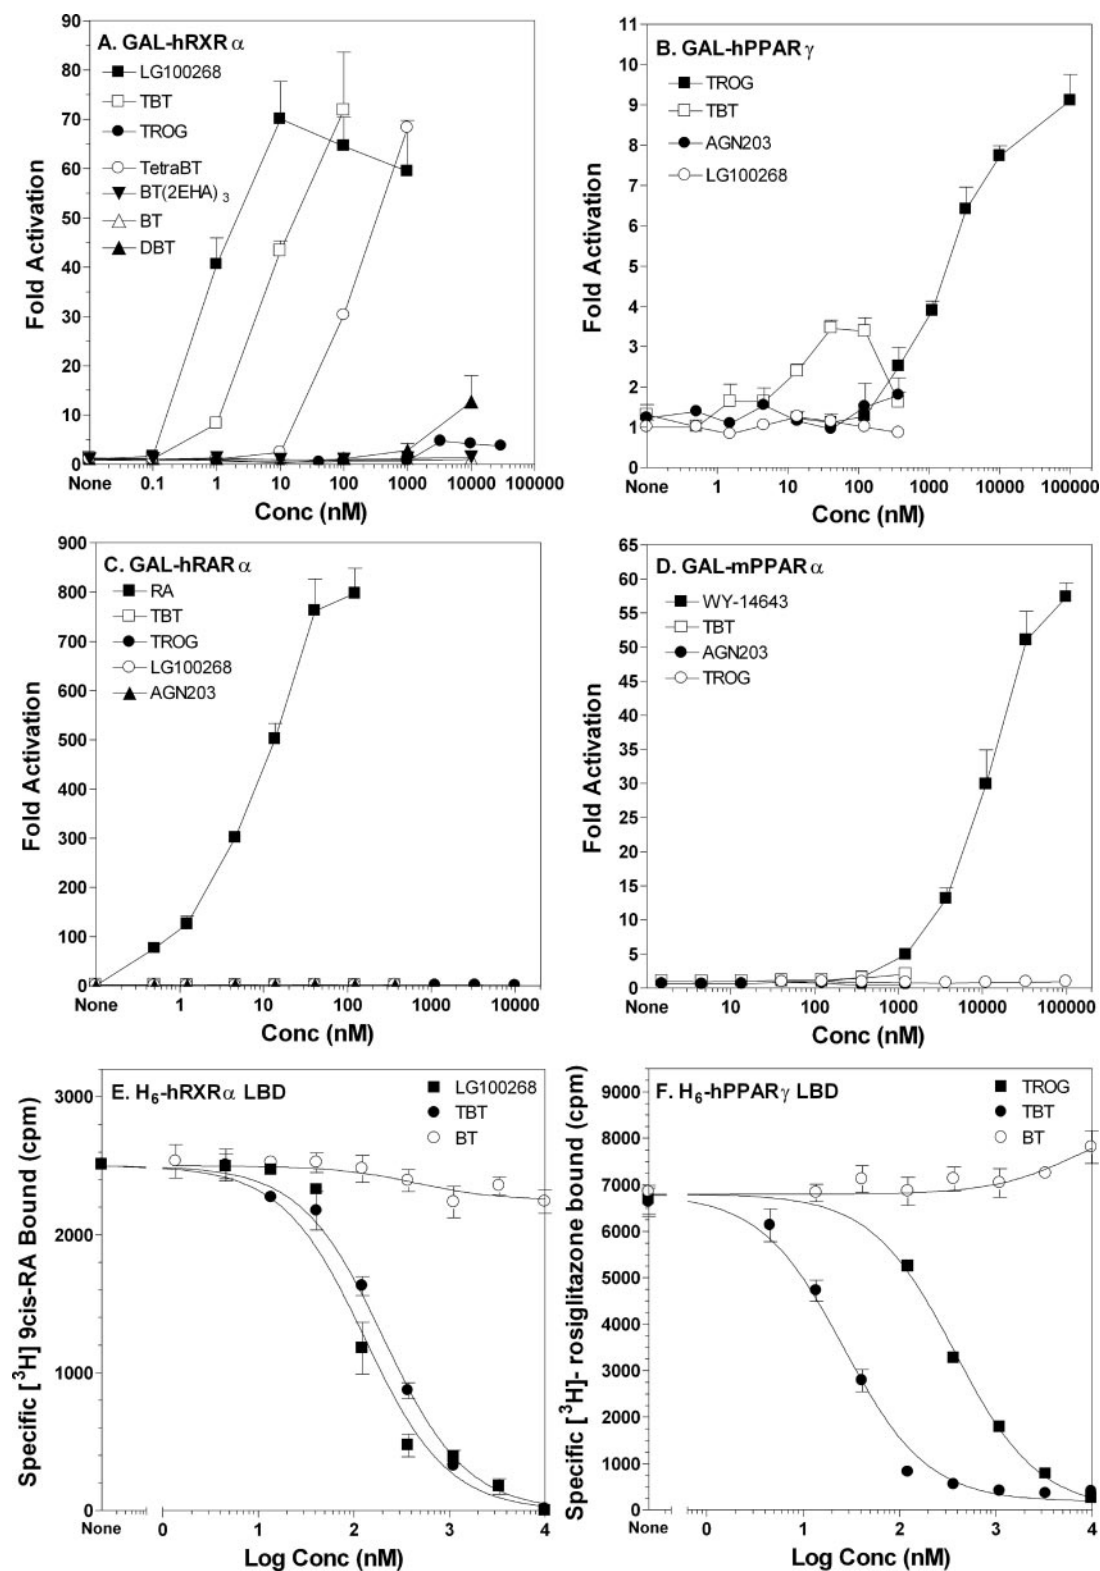

**Fig. 1.** Organotins Are Agonist Ligands of RXR $\alpha$  and PPAR $\gamma$

Organotins are high-affinity ligand agonists of RXR $\alpha$  and PPAR $\gamma$ . A–D, Activation of GAL4-hRXR $\alpha$ , -hPPAR $\gamma$ , -hRAR $\alpha$ , or -hPPAR $\alpha$  in transiently transfected Cos7 cells by organotins and receptor-specific ligands. Data represent reporter luciferase activity normalized to  $\beta$ -galactosidase and plotted as the average fold activation  $\pm$  SEM ( $n = 3$ ) relative to solvent-only controls from representative experiments. E and F, Competition binding curves of histidine-tagged RXR $\alpha$  or PPAR $\gamma$  LBDs with TBT. Data shown are from a representative experiment analyzed in GraphPad Prism 4.0 and  $K_i$  values deduced (Table 3). Conc, Concentration; DBT, dibutyltin chloride; TROG, troglitazone.

**Table 1.** TBT Activates RXRs and RXR-Permissive Heterodimers

| GAL4-NR LBD                           | Fold Activation at 60 nM TBT | Permissive RXR Heterodimer |
|---------------------------------------|------------------------------|----------------------------|
| RXR $\alpha$ ( <i>Homo sapiens</i> )  | 60                           | Yes                        |
| RXR $\alpha$ ( <i>X. laevis</i> )     | 25                           | Yes                        |
| RXR $\gamma$ ( <i>X. laevis</i> )     | 7.0                          | Yes                        |
| NURR1 ( <i>H. sapiens</i> )           | 7.0                          | Yes                        |
| LXR ( <i>H. sapiens</i> )             | 2.1                          | Yes                        |
| PPAR $\alpha$ ( <i>Mus musculus</i> ) | 0.7                          | Yes                        |
| PPAR $\gamma$ ( <i>H. sapiens</i> )   | 5.3                          | Yes                        |
| PPAR $\delta$ ( <i>H. sapiens</i> )   | 1.7                          | Yes                        |
| RAR $\alpha$ ( <i>H. sapiens</i> )    | 0.7                          | No                         |
| TR $\beta$ ( <i>H. sapiens</i> )      | 0.4                          | No                         |
| VDR ( <i>H. sapiens</i> )             | 0.5                          | No                         |
| SXR ( <i>H. sapiens</i> )             | 1.0                          | No                         |

Data are fold activation at 60 nM TBT relative to solvent-only controls of transiently transfected Cos7 cells after 24 h ligand treatment. SXR, Steroid and xenobiotic receptor; TR, thyroid hormone receptor.

molar EC<sub>50</sub> values. Monobutyltin gave no significant activation whereas dibutyltin was moderately active in the micromolar range (Fig. 1A and Table 2). Tetrabutyltin was 20-fold less potent than TBT, whereas the branched side-chain butyltin tris(2-ethylhexanoate) [BT(2-EHA)<sub>3</sub>] was inactive (Table 2). Although activation by dialkyltins is weaker than that of TBT, it is potentially significant due to their widespread use in the manufacture of polyvinyl chloride plastics and greater solubility than TBT.

The effect of the hydrocarbon chain length was very pronounced, suggesting an important structure-activ-

**Table 2.** Organotin EC<sub>50</sub> Values for Nuclear Receptor LBDs

| Ligand                          | GAL4-NR LBD Transactivation (EC <sub>50</sub> Values, nM) |               |                |
|---------------------------------|-----------------------------------------------------------|---------------|----------------|
|                                 | hRXR $\alpha$                                             | hRAR $\alpha$ | hPPAR $\gamma$ |
| LGD268                          | 2–5                                                       | na            | na             |
| AGN195203                       | 0.5–2                                                     | na            | na             |
| 9- <i>cis</i> RA                | 15                                                        | na            | na             |
| all- <i>trans</i> RA            | na                                                        | 8             | na             |
| Butyltin chloride               | na                                                        | na            | na             |
| Dibutyltin chloride             | 3000                                                      | na            | na             |
| TBT                             | 3–8                                                       | na            | 20             |
| Tetrabutyltin                   | 150                                                       | ND            | ND             |
| Di(triphenyltin)oxide           | 2–10                                                      | na            | 20             |
| Butyltin tris(2-ethylhexanoate) | na                                                        | ND            | ND             |
| Troglitazone                    | na                                                        | na            | 1000           |
| Tributyltin fluoride            | 3                                                         | ND            | ND             |
| Tributyltin bromide             | 4                                                         | ND            | ND             |
| Tributyltin iodide              | 4                                                         | ND            | ND             |
| Triethyltin bromide             | 2800                                                      | ND            | ND             |
| Trimethyltin chloride           | >10000                                                    | ND            | ND             |

na, Not active; ND, not determined. EC<sub>50</sub> values were determined from dose-response curves of GAL4-NR LBD construct activation in transiently transfected Cos7 cells after 24-h ligand exposure.

ity relationship. A reduction in hydrophobicity from butyl to ethyl side chains raised the EC<sub>50</sub> value by almost 1000-fold into the micromolar range. Trimethyltin was weakly active only above 100  $\mu$ M (Table 2). Substitution of the halide component had no significant effect on the EC<sub>50</sub> values for TBT, probably due to the lability of the halide atom through exchange in aqueous tissue culture media where chloride ions are prevalent.

### TBT Is a Potent Ligand of Both RXR $\alpha$ and PPAR $\gamma$

Many, if not most, natural and synthetic nuclear receptor agonists act as ligands that specifically interact with their cognate receptor LBDs. We therefore performed equilibrium competition binding experiments with purified histidine-tagged human RXR $\alpha$  (H<sub>6</sub>-RXR $\alpha$ ) and PPAR $\gamma$  (H<sub>6</sub>-PPAR $\gamma$ ) LBDs to determine whether the potent and specific activation of these receptors by TBT was due to direct ligand-receptor interaction (Fig. 1, E and F).

The equilibrium binding curves indicate that TBT is a high-affinity, competitive ligand for 9-*cis* RA-bound RXR $\alpha$ . The inhibition equilibrium dissociation constant was calculated by the Chang-Prusoff method [inhibition constant (K<sub>i</sub>) = dissociation constant (K<sub>d</sub>)] as 12.5 nM (10–15 nM; 95% confidence interval) (Table 3). By comparison, the value obtained for the synthetic RXR agonist LG100268 was 7.5 nM, which compared favorably with its published value of approximately 3  $\pm$  1 nM (27). Therefore, the identification of TBT as an RXR ligand expands the molecular definition of known rexinoids (agonists able to activate RXR) to include this structurally unique class of organotin compounds.

Somewhat surprisingly, we also observed potent specific competitive binding by TBT for rosiglitazone bound to human PPAR $\gamma$  LBD (Fig. 2B). The deduced K<sub>i</sub> of 20 nM (17–40 nM; 95% confidence interval) was slightly higher than for RXR $\alpha$  but significantly better than the K<sub>i</sub> for the PPAR $\gamma$  agonist troglitazone, which

**Table 3.** TBT Binding Constants (K<sub>d</sub>) for hRXR $\alpha$  and hPPAR $\gamma$  LBDs

| Ligand       | Receptor Competitive Inhibition Binding Constants K <sub>i</sub> (nM $\pm$ 95% CI) |                               |                           |
|--------------|------------------------------------------------------------------------------------|-------------------------------|---------------------------|
|              | H <sub>6</sub> -RXR $\alpha$                                                       | H <sub>6</sub> -PPAR $\gamma$ | Published                 |
| TBT          | 12.5 (10–15)                                                                       | 20 (17–40)                    |                           |
| LG100268     | 7.5 (6–10)                                                                         | ND                            | 3 $\pm$ 1 <sup>a</sup>    |
| Troglitazone | ND                                                                                 | 300 (270–335)                 | 300 $\pm$ 30 <sup>b</sup> |

Competition binding curves were determined at constant <sup>3</sup>H-specific ligand concentrations [20 nM 9-*cis*-RA, K<sub>d</sub> = 1.4 nM (87) or rosiglitazone, K<sub>d</sub> = 41 nM (88)] with increasing cold competitor ligands over the range indicated in Fig. 1, E and F. Data were analyzed in GraphPad Prism by nonlinear regression of a competitive one-site binding equation (Chang-Prusoff method) to determine K<sub>i</sub> values  $\pm$  95% confidence intervals (n = 3). CI, Confidence interval; ND, not determined.

<sup>a</sup> RXR $\alpha$ :LG100268 K<sub>d</sub> = 3  $\pm$  1 nM (27).

<sup>b</sup> PPAR $\gamma$ :troglitazone K<sub>d</sub> = 300  $\pm$  30 nM (28).

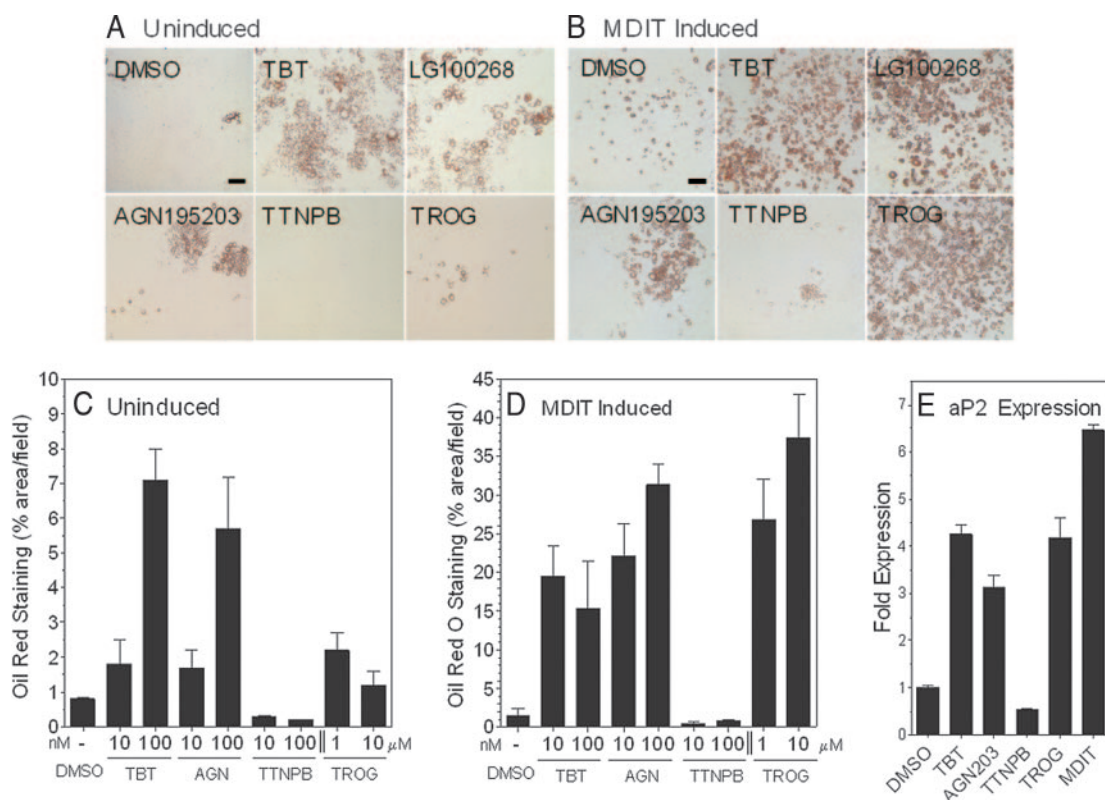

**Fig. 2.** Tributyltin Induces Adipogenesis in 3T3-L1 Cells

Uninduced (A) and MDIT-induced (B) 3T3-L1 cultures grown for 1 wk in the presence of vehicle (DMSO), or ligands were analyzed for mature adipocyte differentiation by Oil Red O staining. Scale bar represents 100  $\mu\text{m}$ . C and D, The percentage area stained was determined by automated analysis of random fields ( $n = 9$ ) from high-contrast dissecting scope photographs of monolayers analyzed in ImageJ; 1–100 nM of TBT, AGN195203, and TTNPB or 1–10  $\mu\text{M}$  troglitazone. E, Quantitative real-time PCR (QRT-PCR) of adipocyte-specific fatty acid binding protein aP2 (aP2/Fabp4) expression levels in postconfluent 3T3-L1 cells treated with the indicated ligands for 24 h. Data were normalized to glyceraldehyde-3-phosphate dehydrogenase controls and plotted as average fold induction  $\pm$  SEM ( $n = 3$ ). TROG, Troglitazone.

yielded a  $K_i$  of 300 nM, consistent with its published  $K_d$  (28). The  $K_d$  values for TBT binding to RXR $\alpha$  (12.5 nM) and PPAR $\gamma$  (20 nM) are also in close agreement with  $EC_{50}$  values obtained from transient transfection assays using GAL4-RXR $\alpha$  and GAL4-PPAR $\gamma$  constructs (Table 2).

Taken together, these data show that organotins such as TBT, although structurally distinct from previously described natural or synthetic ligands, can interact with RXR $\alpha$  and PPAR $\gamma$ , via direct ligand binding to induce productive receptor-coactivator interactions and promote transcription in a concentration-dependent manner. Organotins are therefore potent nanomolar receptor activators on par with synthetic RXR and PPAR $\gamma$  ligands such as LG100268, AGN195203, and thiazolidinediones.

#### TBT Promotes Adipogenesis in the Murine 3T3-L1 Cell (Embryonic Murine Preadipocyte Fibroblast Cell Line) Model

Numerous studies have demonstrated the critical role played by RXR $\alpha$ :PPAR $\gamma$  signaling in regulation of

mammalian adipogenesis (29–31). In the murine 3T3-L1 preadipocyte cell model, adipogenic signals induce early key transcriptional regulators such as CCAAT/enhancer binding proteins (C/EBPs)  $\beta$  and  $\delta$  that lead to mitotic clonal expansion of growth-arrested preadipocytes and induction of the late differentiation factors C/EBP $\alpha$  and PPAR $\gamma$  (32–34). The combination of C/EBP $\alpha$  expression together with PPAR $\gamma$  signaling efficiently drives terminal adipocyte differentiation and lipid accumulation. We therefore tested whether TBT signaling through RXR:PPAR $\gamma$  could promote adipogenesis in the murine 3T3-L1 differentiation assay and compared its effect to other RXR-specific or PPAR $\gamma$  ligands (Fig. 2). Undifferentiated 3T3-L1 cells were cultured for 1 wk in the presence of ligands either with or without a prior 2-d treatment with MDIT (an adipogenic-sensitizing cocktail of 3-isobutyl-1-methylxanthine, dexamethasone, insulin, and T $_3$ ) (35). Cells were then scored for lipid accumulation using Oil Red O staining to determine the degree of terminal adipocyte differentiation. TBT was as effective as LG100268 or AGN195203 in promoting dif-

differentiation in the absence of MDIT treatment, increasing the number of differentiated adipocytes about 7-fold over solvent-only controls (Fig. 2, A and C). The PPAR $\gamma$  agonist troglitazone was a weak inducer in the absence of MDIT. Prior treatment with MDIT increased the response to TBT, LG100268, and AGN195203 a further 3- to 5-fold (Fig. 2, B and D). MDIT treatment also boosted the response to troglitazone to equivalent levels as expected from published studies showing that combination treatment with PPAR $\gamma$  ligands promotes efficient adipocyte differentiation (36–38). In contrast, the RAR agonist TTNPB inhibited the differentiation of 3T3-L1 cells, consistent with previously published data that showed RAR signaling blocks adipogenesis during the early stages of differentiation *in vitro* and can modulate adiposity and whole body weight *in vivo* (39–41). The differential response of 3T3-L1 cells to receptor-selective retinoids indicates that TBT favors RXR homodimer or permissive RXR-heterodimer rather than RXR:RAR signaling in this cell model.

Adipocyte differentiation by TBT was accompanied by direct transcriptional effects on RXR:PPAR $\gamma$  targets such as adipocyte-specific fatty acid-binding protein (aP2) mRNA. The aP2 promoter contains response elements sensitive to C/EBP factors and RXR $\alpha$ :PPAR $\gamma$  signaling (42). Quantitative real-time PCR analysis showed aP2 levels were elevated by TBT treatment approximately 5-fold at 24 h (Fig. 2E) and 45-fold at 72 h (data not shown). LG100268, troglitazone, and MDIT treatment also increased aP2 expression at these time points whereas the RAR agonist TTNPB was inhibitory, consistent with the observed cellular responses.

### TBT Induces Adipogenic Regulators and Markers of RXR $\alpha$ :PPAR $\gamma$ Signaling *in Vivo*

The ability of organotins to regulate RXR $\alpha$ :PPAR $\gamma$  target genes and key modulators of adipogenesis and lipid homeostasis *in vivo* has not been previously examined. Therefore, we next asked whether TBT could perturb expression of critical transcriptional mediators of adipogenesis such as RXR $\alpha$ , PPAR $\gamma$ , C/EBP $\alpha/\beta/\delta$ , and sterol regulatory element binding factor 1 (Srebf1) as well as known target genes of RXR $\alpha$ :PPAR $\gamma$  signaling from liver, epididymal adipose tissue, and testis of 6-wk-old male mice dosed for 24 h with TBT [0.3 mg/kg body weight (b.w.)], AGN195203 (0.3 mg/kg b.w.), troglitazone (3 mg/kg b.w.), or vehicle (corn oil) administered by ip injection. TBT either had no effect or weakly repressed RXR $\alpha$  and PPAR $\gamma$  transcription in liver (Fig. 3, A and B). A more pronounced decrease was observed for RXR $\alpha$ , PPAR $\gamma$ , C/EBP $\alpha$ , and C/EBP $\delta$  in adipose tissue and testis (Fig. 3, B and C). In contrast, TBT, AGN195203, and troglitazone significantly induced expression of the early adipogenic transcription factor C/EBP $\beta$  in liver and testis, whereas it was more weakly induced in adipose tissue. Induction was strongest in testis where TBT and troglitazone

increased expression greater than 10-fold and AGN195203 increased expression 60-fold compared with vehicle controls (Fig. 3C). In addition to C/EBP $\beta$ , the proadipogenic transcription factor Srebf1 was also significantly increased in adipose tissue by all three receptor ligands and weakly induced in liver.

We also observed coordinate changes in several well-characterized direct target genes of RXR:PPAR $\gamma$  signaling. Fatty acid transport protein (Fatp) acts as a key control point for regulation of cellular fatty acid content. The Fatp promoter contains a functional PPAR response element shown to be sensitive to RXR:PPAR $\gamma$  signaling in 3T3-L1 adipocytes and white fat (43–46). Fatp mRNA levels were up regulated 2- to 3-fold in liver and epididymal adipose tissue but not testis by TBT, AGN195203, and troglitazone (see Fig. 5, A and B). Similarly, the PPAR $\gamma$  target phosphoenolpyruvate carboxykinase 1 (PEPCK/Pck1) (47), the rate-limiting step in hepatic gluconeogenesis and adipose glyceroneogenesis, was up-regulated in liver and adipose tissues by TBT or troglitazone treatment.

Signaling through RXR:PPAR $\gamma$ , RXR:LXR, and ADD1/Srebf1 in hepatocytes has been shown to modulate fatty acid synthesis through transcriptional control of acetyl-coenzyme A carboxylase (Acac), the rate-limiting step in long-chain fatty acid synthesis (48, 49), as well as fatty acid synthase (Fasn) (50–53). Hepatic expression of both Acac and Fasn was unregulated between 1.5–2.5-fold by TBT, AGN195203, and troglitazone. Therefore, the coordinate increased expression of Fatp, Pck1, Acac, and Fasn in liver suggests that TBT stimulates fatty acid uptake and triglyceride synthesis. Similar changes have been reported in the induction of hepatic steatosis by overactive PPAR $\gamma$  signaling (49, 54).

Taken together, these data show that TBT exposure induces lipogenic RXR:PPAR $\gamma$  target gene expression, in adipose tissue and liver, and modulates associated early adipocyte differentiation factors such as C/EBP $\beta$  and Srebf1. We inferred from these data that organotins are potential adipogenic agents *in vivo*.

### Developmental Exposure to TBT Disrupts Lipid Homeostasis and Adipogenesis in Vertebrates

Based on its molecular pharmacology, ability to induce 3T3-L1 adipocyte differentiation, and *in vivo* transcriptional responses, we reasoned that TBT would disrupt normal endocrine control over lipid homeostasis and impact adipogenesis, particularly when exposure occurred during sensitive periods of development. We therefore tested this hypothesis in two vertebrate model systems, mouse and *X. laevis*, during embryogenesis.

Pregnant C57BL/6 mice were injected daily from gestational d 12–18 with TBT (0.05 or 0.5 mg/kg body weight ip) dissolved in sesame oil or vehicle alone. Pups were then killed at birth, and histological sections were prepared from liver, testis, mammary gland, and inguinal adipose tissue. Sections were stained

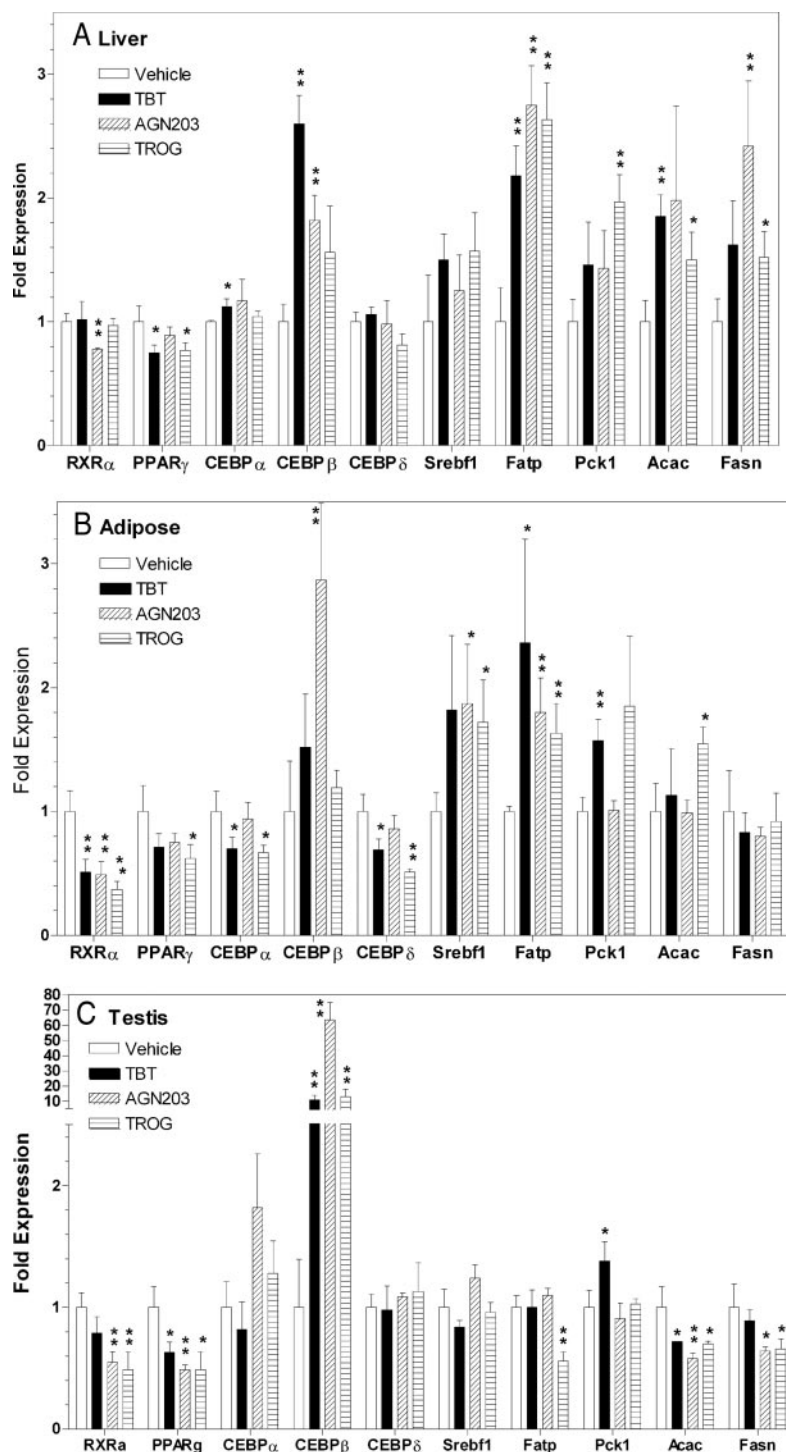

**Fig. 3.** *In Vivo* Induction of Adipogenic Modulators and RXR:PPAR $\gamma$  Target Genes

C57BL/6 male mice (three animals per treatment) were dosed with TBT (0.3 mg/kg b.w.), AGN195203 (0.3 mg/kg), troglitazone (3 mg/kg b.w.), or vehicle (corn oil) only by ip injection. Animals were killed after 24 h and dissected and cDNA was prepared from liver, epididymal fat pad, or testis for quantitative real-time PCR analysis. Expression levels were normalized to histone H2b and shown as the average fold change  $\pm$  SEM ( $n = 3$ ) compared with vehicle (corn oil) controls. Control vs. ligand treatments were analyzed by the unpaired Student's  $t$  test: \*,  $P < 0.1$ ; \*\*,  $P < 0.05$ . TROG, Troglitazone.

with Oil Red O to assess changes in total tissue lipid accumulation. TBT exposure caused a disorganization of hepatic (Fig. 4, A and B) and gonadal (Fig. 4, C and

D) architecture and significantly increased Oil Red O staining in treated animals vs. controls. Liver sections exhibited signs of steatosis consistent with the mis-

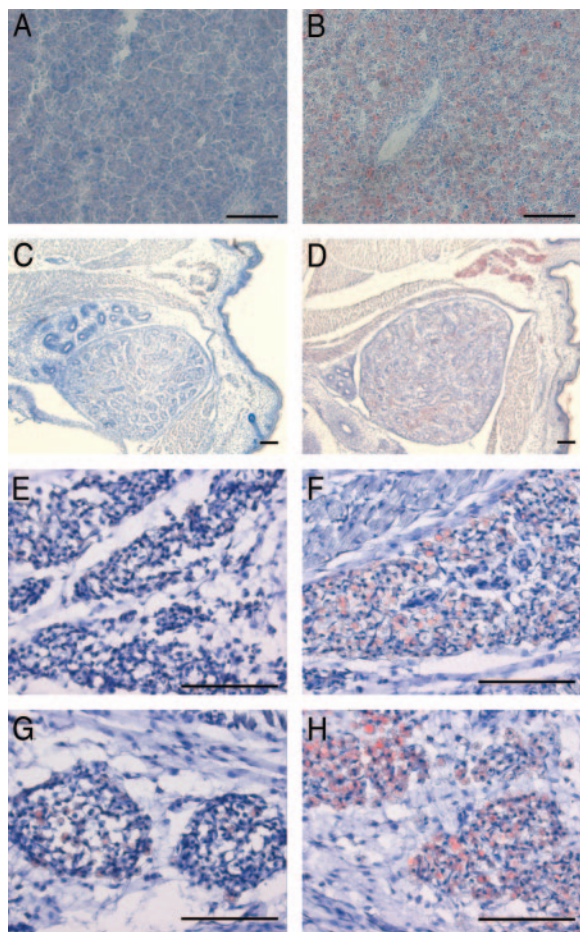

**Fig. 4.** *In Utero* Exposure to TBT Increases Adiposity in Mouse Liver, Testis, and Adipose Depots

Histological sections (12  $\mu\text{m}$ ) of newborn mouse liver (A and B), testis (C and D), inguinal adipose (E and F) and mammary adipose (G and H) stained with Oil Red O and counterstained with hematoxylin following *in utero* exposure to vehicle only (sesame oil) (A, C, E, and G) or 0.5 mg/kg b.w. TBT (B, D, F, and H) given s.c. daily from E12–18. Scale bar, 100  $\mu\text{m}$ .

regulation of fatty acid uptake and synthesis observed using molecular markers. In addition, Oil Red O positive staining in mammary and inguinal adipose (Fig. 4, E–H) tissues was dramatically elevated, reflecting either an increase in lipid accumulation or an increase in mature adipocytes.

To determine whether exposure induced long-term changes in growth or adipose tissue, we followed mice from birth to adulthood after *in utero* exposure to TBT as indicated above. At birth, mice were cross-fostered to unexposed dams, and total body weight was recorded until 10 wk of age (Fig. 5A). Growth curves for male and female pups showed a slight trend for lower total body weight consistent with published observations (9) but were not statistically significant at 10 wk [control vs. TBT: male, 26.00 g  $\pm$  0.70 (n = 9) vs. 25.53 g  $\pm$  0.39 (n = 10),  $P = 0.583$ ; female, 21.22 g  $\pm$  0.41 (n = 10), vs. 20.24 g  $\pm$  0.24 (n = 10),  $P = 0.0529$ ]. Males were killed at 10 wk and epididymal fat pads were

weighed (Fig. 5B). Adipose mass in TBT-treated males was increased significantly by 20% over controls [control vs. TBT: 0.30 g  $\pm$  0.020 (n = 9) vs. 0.36 g  $\pm$  0.018 (n = 10),  $P = 0.0374$ ]. These data support the conclusion that TBT can increase body adiposity without overtly increasing total body weight. Similar lipid accumulation and changes in adipose tissue mass have also been observed after TZD or rexinoid treatment (55–57).

We had previously observed that TBT activated *Xenopus* RXRs (Table 1) and reasoned that the strong conservation in vertebrate nuclear receptor signaling pathways should result in consistent responses to organotin and RXR/PPAR $\gamma$  ligands across diverse vertebrate species. We therefore tested chronic exposure to environmentally relevant low doses of TBT (1–10 nM), the RXR-specific ligands LG100268 and AGN195203 (10–100 nM), troglitazone (0.1–1  $\mu\text{M}$ ), and estradiol (1–10 nM) on developing *X. laevis* tadpoles from stage 48 to metamorphosis. To determine the effectiveness of these doses in *X. laevis* tadpoles, we used aromatase expression as a molecular marker because activity and expression are sensitive to endocrine disruption by organotins and RXR/PPAR $\gamma$  ligands in mammals (17, 18). *Xenopus* aromatase expression was similarly repressed 2- to 3-fold by 10 nM TBT, AGN195203, LG100268, or 1  $\mu\text{M}$  troglitazone at stage 56 tadpoles (Fig. 6A) and at all subsequent stages. Despite significant ligand-induced aromatase down-regulation, neither sex ratios nor the time required to reach metamorphosis was altered (data not shown). *Xenopus* liver and kidney also exhibited no gross structural abnormalities at the doses given.

However, consistent with the testis and adipose results from mice presented above, we observed a dose-dependent increase in ectopic adipocyte formation posterior to the fat bodies in and around the gonads of both sexes after TBT or RXR/PPAR $\gamma$  ligand exposure (Fig. 6B). In contrast, estradiol-treated animals did not show increased adipocyte formation compared with controls. At 10 nM TBT, 10 nM AGN195203, or 1  $\mu\text{M}$  troglitazone, ectopic adipocytes were observed in approximately 45–60% of animals. At the highest dose of TBT in males, testicular tissue was interspersed with, or replaced by, adipocytes along the anterior-posterior axis (Fig. 6, D, E, and G).

The concordant changes observed in *Xenopus* aromatase expression, gonadal adipocyte formation, and increased murine adiposity after exposure to TBT, RXR and PPAR $\gamma$  ligands are therefore consistent with a common mechanism of action through RXR:PPAR $\gamma$  activation, supporting the conclusion that endocrine disruption via nuclear receptor transcriptional regulation is a novel and key feature of organotin toxicity.

## DISCUSSION

We have shown above that TBT is a potent inducer of adipogenesis, *in vitro* and *in vivo*, by acting as a novel,



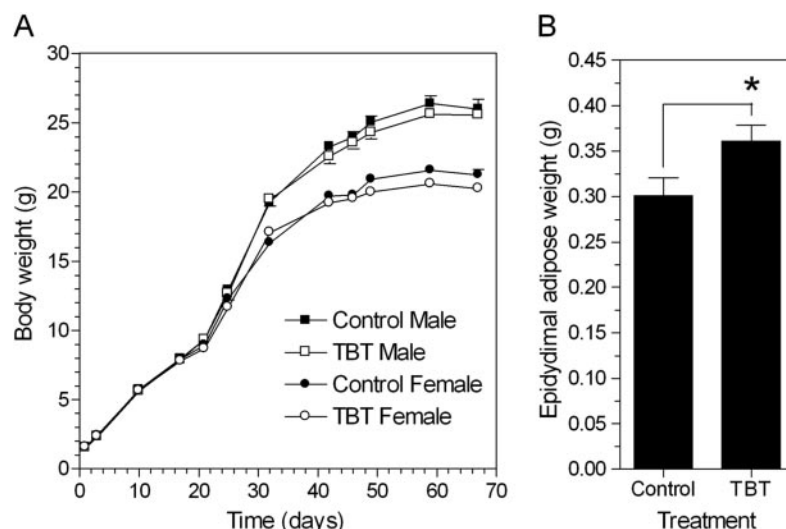

**Fig. 5.** *In Utero* Exposure to TBT Increases Adipose Mass But Not Body Weight in Adult Mice

A, Growth curves of C57BL/6 male and female pups exposed to control (sesame oil) or TBT *in utero* (E12–18). Data are mean  $\pm$  SEM ( $n = 10$ ). B, Epididymal fat pad weights from control or TBT-treated males at 10 wk. \*, Epididymal adipose mass from exposed males was approximately 20% greater [control vs. TBT:  $0.30 \text{ g} \pm 0.020$  ( $n = 9$ ) vs.  $0.36 \text{ g} \pm 0.018$  ( $n = 10$ ); \*,  $P = 0.0374$ ]. Data represent mean  $\pm$  SEM ( $n = 9$ –10).

high-affinity xenobiotic ligand for RXR $\alpha$  and PPAR $\gamma$ . The ability of organotins to bind and activate these receptors, in particular the RXRs, which exhibit very restricted ligand specificity, is unexpected given the radically different chemical composition and three-dimensional molecular structure of organotins when compared with known natural and synthetic nuclear receptor ligands. Typically, RXR ligands comprise a carboxylic acid functional group and a three-dimensional molecular shape that mimics 9-*cis* RA. Structure-activity profiles indicate distinct structural preferences for organotins but also a relatively broad accommodation for agonist activity that is not easily reconciled with the classical ligand-binding model. Organotins may therefore interact somewhat differently than previously described RXR/PPAR $\gamma$  ligands with receptor LBDs to induce productive conformational changes required for coactivator recruitment. However, the binding data indicate that TBT is a potent and efficacious ligand for both RXRs and PPAR $\gamma$  that interacts, at least partially, with the same receptor-binding sites of other high-affinity ligands and promotes the necessary cofactor interactions required for agonist activation. In the study of Kanayama *et al.* (24), TBT was only effective in coactivator recruitment assays with PPAR $\gamma$  above  $10 \mu\text{M}$  *in vitro*. However, in accord with our findings, they show that TBT activated PPAR $\gamma$  significantly at nanomolar concentrations in transfection assays. This may reflect a limitation of preference in the cofactor used *in vitro*. Alternatively, the lower maximal activation observed with TBT on PPAR $\gamma$  in cells ( $\sim 30\%$  at  $100 \text{ nM}$  TBT cf troglitazone) is consistent with one of two possibilities: either non-specific cellular toxicity at high levels or activation as a partial agonist.

The ability of TBT to act as a dual ligand for permissive heterodimers such as RXR $\alpha$ :PPAR $\gamma$ , which can be activated by specific ligands for either receptor, also raises the possibility for additive or synergistic effects that might increase the potency of these compounds *in vivo* at low doses for this specific signaling pathway. Of note is that receptor activation is observed at nanomolar concentrations, whereas other mechanisms of toxicity and endocrine disruption, *e.g.* direct inhibition of aromatase activity, typically occur in the micromolar range. Furthermore, the activation of other permissive RXR heterodimeric partners, *e.g.* LXR and NURR1, suggests that organotins may act more widely to disrupt multiple nuclear receptor-mediated hormonal signaling pathways.

The biological consequences of organotin activation of the RXR:PPAR $\gamma$  signaling pathway are predictable and should follow known aspects of RXR/PPAR $\gamma$  biology. The RXR:PPAR $\gamma$  pathway plays a key role in adipocyte differentiation and energy storage, and is central to the control of whole-body metabolism (58). PPAR $\gamma$  activation increases the expression of genes that promote fatty acid storage and represses genes that induce lipolysis in adipocytes in white adipose tissue (59). PPAR $\gamma$  such as the thiazolidinediones can modulate insulin sensitivity due to these effects on the adipocyte, reversing insulin resistance in the whole body by sensitizing the muscle and liver tissue to insulin (60). However, a consequence of this increase in whole-body insulin sensitivity is that fat mass is increased through the promotion of triglyceride storage in adipocytes. Evidence is also mounting that depot-specific remodeling and adipocyte numbers increase after thiazolidinedione treatment (55–57). Therefore, PPAR $\gamma$  agonists comprise a class of phar-

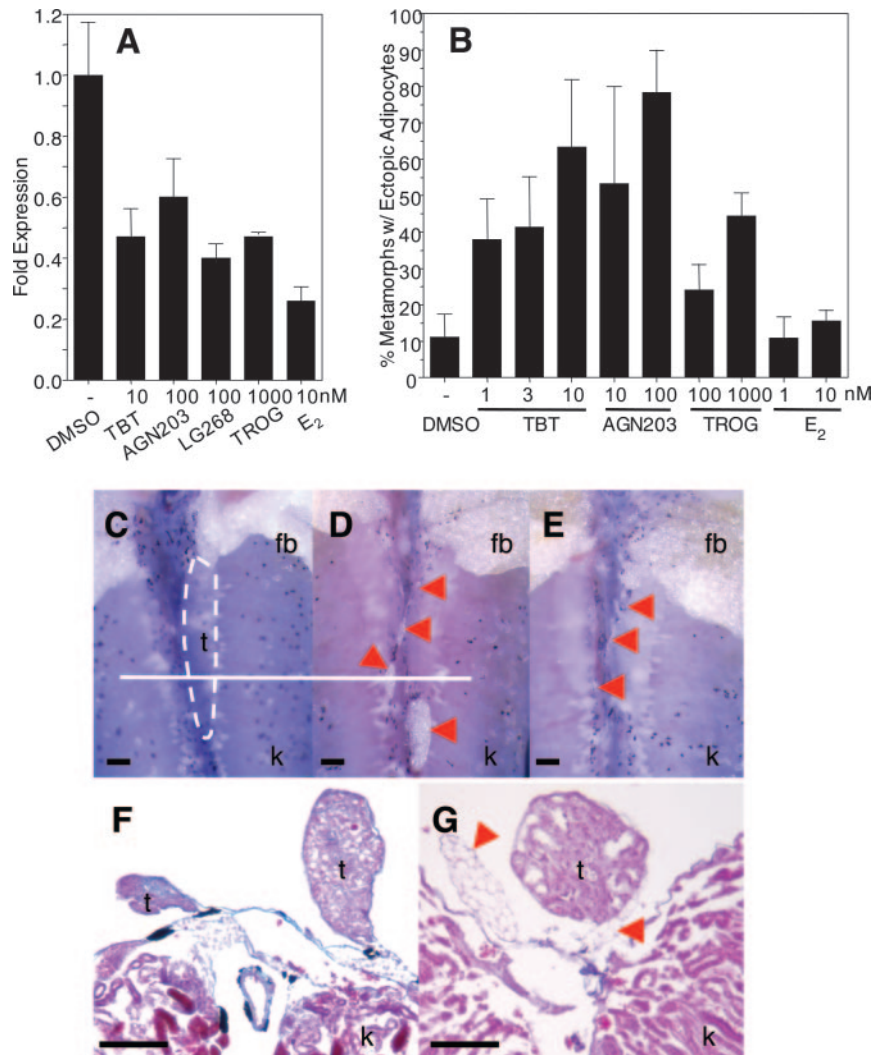

**Fig. 6.** Endocrine Disruption of RXR:PPAR $\gamma$  Signaling and Ectopic Induction of Adipocytes in *X. laevis* by TBT

A, Expression levels of *Xenopus* aromatase (XCYP19) were determined in tadpoles (stage 56) by quantitative real-time PCR after 24-h exposure to vehicle only (DMSO) or the indicated ligands. Expression was normalized to *Xenopus* EF1 $\alpha$  and expressed as average fold change in expression  $\pm$  SEM ( $n = 9$ ) relative to vehicle controls. B, *X. laevis* tadpoles were dosed weekly under static renewal conditions with indicated ligands from stage 48 (before gonadogenesis) until stage 64 (metamorphic climax). Metamorphs (stage 66) were scored for ectopic adipocyte patches on gonads and urogenital ducts. Data are shown as the percentage of metamorphs exhibiting ectopic adipocyte patches posterior to the fat bodies; mean  $\pm$  SD from triplicate tanks. C–E, Dissecting microscope photographs of kidneys (k), testis (t), and fat bodies (fb) from DMSO control, 10 nM TBT, and 1  $\mu$ M troglitazone-treated male metamorphs. Multiple ectopic adipocyte patches (red arrows) are present posterior to the fat bodies along the anterior-posterior axis of gonads in TBT (D)- and troglitazone (E)-treated animals but not controls (C). Histological sections of kidneys and gonads from the same control (F) and 10 nM TBT (G)-treated males at the level indicated by the white line in C and D. Gonadal and connective tissue was either completely replaced by, or interspersed with, adipocytes (red arrows) in TBT-treated animals. Sections were developed with Mallory's trichrome stain. Scale bars, 100  $\mu$ m.

maceutical therapies for type 2 diabetes that can also promote obesity by increasing fat storage. Likewise, RXR ligands also act as insulin-sensitizing agonists in rodents (61), underscoring the permissive nature of the PPAR $\gamma$ :RXR heterodimer and the potential effects on diabetes and obesity of both PPAR $\gamma$  and RXR agonists.

Our data are consistent with recent studies that organotins can mediate some of their endocrine dis-

ruption effects by transcriptional regulation through nuclear receptors, in particular RXR:PPAR $\gamma$  signaling (17–19, 24). Consequently, TBT exposure can promote adipocyte differentiation in the same manner as other RXR or PPAR $\gamma$  ligands *in vitro* using the standard murine 3T3-L1 cell model and *in vivo* through increased adiposity after intrauterine organotin exposure in newborn mice. It is currently unknown whether the increased adiposity *in vivo* results from an increase

in adipocyte precursor cell number, enhanced adipocyte differentiation from the same number of precursors, an increase in adipocyte size without an increase in number, or some combination of these.

The prevailing epidemiological data ascribe high-density caloric and/or fatty diets coupled with decreased physical activity as the root causes for the rise in obesity rates in the general population (62). The contribution of genetic components is less clear. Although genetic variation contributes to an individual's propensity to develop obesity, the rapid worldwide increase in obesity suggests that interaction with the modern environment exposes inherent genetic differences. The Barker hypothesis postulates that *in utero* fetal nutritional status is a potential risk factor for metabolic syndrome diseases (63–67). In this view, developmental metabolic programming of a thrifty phenotype limits the range in adaptive responses to the environment, e.g. diet and exercise, in later life (68). Experimental evidence from animal models lends support to this hypothesis (69). Plausible mechanisms include imprinting of obesity-sensitive hormonal pathways or changes in cell type and number, e.g. adipocytes, established during development.

Others, however, argue that the environment plays another role in obesity. Because the increase in obesity rates parallels the rapid growth in the use of industrial chemicals over the past 40 yr, it is plausible and provocative to associate *in utero* or chronic lifetime exposure to chemical triggers present in the modern environment with this epidemic. Hence, an “obesogen” model predicts the existence of xenobiotic chemicals that inappropriately regulate lipid metabolism and adipogenesis to promote obesity. Several recent studies serve as proof-of-principle for such a hypothesis. Environmental estrogens such as bisphenol A and nonylphenol, for instance, can promote adipocyte differentiation or proliferation in murine cell lines (70, 71). Furthermore, epidemiological studies link maternal smoking during pregnancy to an elevated risk of childhood obesity (72–76).

Seen in this context, we propose that organotins such as TBT and its congeners are chemical stressors or obesogens that activate RXR:PPAR $\gamma$  signaling to promote long-term changes in adipocyte number and/or lipid homeostasis after developmental or chronic lifetime exposure.

## MATERIALS AND METHODS

### Plasmids and Transfections

pCMX-GAL4 and pCMX-VP16 plasmid fusion constructs to nuclear receptor LBDs and coactivators [GAL4-hRAR $\alpha$ , hRXR $\alpha$ , -xRXR $\alpha/\gamma$ , -hPPAR $\gamma$ , -mPPAR $\alpha$ , -human steroid and xenobiotic receptor (SXR), -NURR1, -VDR, -LXR, -hACTR, -hPPAR-binding protein (PBP), -human steroid receptor coactivator-1 (SRC-1), human transcriptional intermediary factor 2 (TIF2)] have been previously described (77–82). Transfections were performed in Cos7 cells (transformed green

monkey kidney fibroblast cell line) essentially as described elsewhere (83) using MH200-x4-TK-Luc as reporter and normalized to pCMX- $\beta$ -galactosidase controls. Briefly, Cos7 cells were seeded at 5000 cells per well in 96-well tissue culture plates in 10% fetal bovine serum/DMEM and transfected for 8 h with 11  $\mu$ g/plate of DNA/calcium phosphate precipitate mix (MH200x4-TK-Luc-CMX- $\beta$ -galactosidase-nuclear receptor/coactivator effector(s) at a ratio of 5:5:1). Cells were washed free of precipitate with PBS and media were replaced with serum-free insulin, transferrin, lipid, bovine serum albumin supplemented (ITLB)/DMEM (84) plus ligands for an additional 24 h before assays for luciferase and  $\beta$ -galactosidase activity. All transfection data points were performed in triplicate, and all experiments were repeated at least three times.

### Quantitative Real-Time PCR Analyses

Total cellular RNA from C57BL/6 mouse and *X. laevis* tissues was isolated with Trizol reagent and reversed transcribed with oligo dT and Superscript II (Invitrogen, San Diego, CA) according to the manufacturer's instructions. Triplicate cDNA samples (50 ng/reaction) were analyzed by quantitative real-time PCR on a DNA Engine Opticon thermal cycler [MJ Research (Watertown, MA)/Bio-Rad Laboratories (Hercules, CA)] using SYBR Green chemistry (PerkinElmer Life Sciences, Wellesley, MA). Fold changes in expression levels were calculated after normalization to histone Hist2h4 using the  $\Delta$ - $\Delta$  cycle threshold method (85). Gene-specific primers were as follows. Hist2h4 forward (F): 5'-CCCGTGGTGTGC-TGAAGGTGTT-3'; reverse (R), 5'-GAATTGAAGCGCGGC-GTCTA-3'; RXR $\alpha$  F: 5'-CGGCTGCTCAGGGTACTTGTGTTT-3'; R, 5'-CGGCTGCTCAGGGTACTTGTGTTT-3'; PPAR $\gamma$  F: 5'-TGGGTGAAACTCTGGGAGATTC-3'; R, 5'-AATTTCTTG-TGAAGTGCATAGGC-3'; C/EBP $\alpha$  F: 5'-CCAAGAAGTCG-TGGACAAGA-3'; R, 5'-CGGTCATTGTCACTGGTCAACT-3'; C/EBP $\beta$  F: 5'-GCCCGCCGCTTTAGACC-3'; R, 5'-CG-CTCGTGCCTGCCAATG-3'; C/EBP $\delta$  F: 5'-AACCCGCGGC-CCTTCTACGAG-3'; R, 5'-ACGCGCGCATGGAGTCAAT-3'; aP2 F: 5'-GAATTCGATGAAATCACCGCA-3'; R, 5'-CTCTTT-ATTGTGGTGCAGTTTCCA-3'; FATP F: 5'-AGCCGCTTCTG-TAGTACTGTGT-3'; R, 5'-ACCGAAGCGCTGCGTGAA-CTC-3'; ACS F: 5'-CCCAGCCAGTCCCACCAG-3'; R, 5'-CACACCACTCAGGCTCACACTCGT-3'; FASN F: 5'-TCGG-TGTGGTGGGTTGGTGAAT-3'; R, 5'-ACTTGGGGCGCT-GAGATGTGTTGC-3'; ACAC F: 5'-G GATGGCAGCTCTGGA-GGTGTATG-3'; R, 5'-TGTCCTTAAGCTGGCGGTGTTGTA; Pck1 F: 5'-CTGGCAGCATGGGGTGTGTTGATAGG-3'; R, 5'-TGCCGAAGTTGTAGCCGAAGAAGG-3'; Srebf1 F: 5'-GCC-CTGCCCCACCTCAAACCT-3'; R, 5'-ACTGGCAGCGGCAT-CCTTCCTC-3'; *Xenopus* EF1 $\alpha$  F: 5'-GATCCCAGGAAAGC-CAATGTGC 3'; R, 5'-CCGGATCCTGCTGCCTTCTCT-3'; *Xenopus* CYP19 (aromatase) F: 5'-GTCTGGATTAATGGCGAG-GAAACA-3'; R, 5'-CTGATGAAGTATGGCCGAATGACC-3'.

### Ligand Binding

Histidine-tagged RXR $\alpha$  LBD (H $_6$ -RXR $\alpha$  LBDs) was expressed and purified from pET15b(+) vector in BL21(DE3) pLysS bacteria cultures after induction with 1 mM isopropyl- $\beta$ -D-thiogalactopyranoside for 3 h at 37 C (86). Purified H $_6$ -PPAR $\gamma$  was purchased from Invitrogen. Proteins were bound to 96-well Nickel Chelate Flashplates (PerkinElmer Life Sciences) at 100  $\mu$ g/ml overnight at 4 C and washed five times with 200  $\mu$ l/well Flashplate Assay Buffer (20 mM HEPES, pH 7.9; 100 mM KCl, 0.1% cholamidopropyltrimethylammonio-2-hydroxy-1-propanesulfonate, 0.1 mM dithiothreitol). Competition assays typically used 1–5 nM [ $^3$ H]-9-*cis*-RA (PerkinElmer Life Sciences) or 10–50 nM [ $^3$ H]rosiglitazone (American Radiochemicals, Inc., St. Louis, MO) plus cold competitor ligands in Flashplate Assay Buffer at concentrations indicated in the figures. Plates were incubated at room temperature, pro-

tected from light, and read after 4 h on a Packard Topcount scintillation counter (Packard Instruments, Meriden, CT). Specific bound counts/min were determined by subtraction of counts/min from uncoated wells at each ligand concentration. Data were analyzed with GraphPad Prism 4.0 (GraphPad Software, Inc., San Diego, CA) using a one-site competition binding equation to determine  $K_i$  values for competitor ligands;  $K_d$  values of 1.4 and 41 nM for 9-*cis*-RA and rosiglitazone for their respective receptors were used in the calculations (87, 88).

### 3T3-L1 Cell Assays

3T3-L1 (American Type Culture Collection, Manassas, VA) cells were maintained as subconfluent cultures by passage every 3 d from cultures seeded at 5000 cells/cm<sup>2</sup> in 8% calf serum/DMEM. For differentiation assays, cells were seeded at  $15 \times 10^3$  cells per well into 24-well tissue culture plates in 8% fetal bovine serum/DMEM, after which cultures were grown for 2 d and then treated with the indicated RXR, RAR, and PPAR ligands either with or without MDIT (100  $\mu$ M 3-isobutyl-1-methylxanthine, 100 nM dexamethasone, 0.1 ng/ml insulin, and 2 nM T<sub>3</sub> thyroid hormone) induction cocktail. Media and ligand treatments were renewed every 2 d. After 1 wk, cells were scored for adipocyte differentiation by Oil Red O staining for lipid droplet accumulation. Cultures were washed with PBS, fixed with 10% formaldehyde for 15 min, washed with distilled water, and stained with filtered Oil Red O solution (4 g/liter, 60% isopropanol) for 15 min. Excess stain was removed by washing three times with distilled water. Three random fields from each well were photographed under phase contrast and analyzed in ImageJ. Images were converted into high-contrast black and white images to visualize lipid droplets and scored as the percentage area per field. Data are shown as the mean  $\pm$  SEM from three wells per treatment. The method was validated by extraction of Oil Red O from stained cells into 100% isopropanol and quantitated by absorbance at 540 nm on a spectrophotometer.

### In Vivo Animal Exposure Experiments

C57BL/6J mice were housed under a 12-h light, 12-h dark cycle. Pregnant mice were dosed by ip injection with TBT [0.05 or 0.5 mg/kg body weight (b.w.)] or vehicle (sesame oil) from embryonic d 12 (E12) every 24 h until the day before delivery. Neonates were killed at the day of delivery and analyzed. The samples were embedded in optimal cutting temperature embedding compound and sectioned (12 mm) using a cryostat. Sections were fixed on slides with 4% paraformaldehyde for 10 min and rinsed in PBS. The slides were then sequentially washed with distilled water and 60% of isopropanol and stained with Oil Red O (4 g/liter, 60% isopropanol). After washing with 60% isopropanol and distilled water, the slides were counterstained with hematoxylin. Sections were evaluated and photographed using a Zeiss microscope (Carl Zeiss, Thornwood, NY).

For long-term growth studies, pups were cross-fostered to unexposed C57BL/6 dams after birth, and litter sizes were kept constant at eight pups per dam (control, two male + two female; TBT treated, two male + two female). Animals were weaned at 3 wk of age and maintained on standard rodent chow. Total body weight was followed until 10 wk of age. Males were then killed, and epididymal fat pads were dissected and weighed.

*X. laevis* tadpoles were sorted at stage 48 (89) and maintained in 1-liter glass tanks in 20% Holtfreter's buffered salt solution (90) at a density of 10 tadpoles per tank on a diet of ground Tetraamin Fish Flakes and spirulina. Compounds prepared in dimethylsulfoxide (DMSO) as 10<sup>5</sup>-fold stock solutions were tested on triplicate tanks and dosed by static renewal after weekly water changes. Metamorphs at stage 64

were transferred to individual containers and fed frozen brine shrimp for 2 wk until stage 66. Froglets were euthanized with 250 mg/liter MS222 in 20% Holtfreter's solution and then scored for gonadal abnormalities and interrenal/gonadal adipocyte formation under a dissecting microscope. Kidneys with attached gonads and livers were fixed in 10% formalin-PBS, embedded in paraffin, and sectioned at 15  $\mu$ m thickness. Sections were developed with Mallory's trichrome stain.

All animal experiments were approved and performed in accordance with Institutional Animal Care and Use Committee protocols.

### Acknowledgments

We thank Drs. I. Blitz, K. Cho, C. Zhou, and T. Osborne for critical reading and comments on the manuscript, Dr. C. Li (Expression Technologies) for the H<sub>6</sub>-RXR $\alpha$  LBD construct, and Dr. R. Chandraratna (Allergan Pharmaceuticals, Irvine, CA) for AGN203 and LG268.

Received September 8, 2005. Accepted March 30, 2006.

Address all correspondence and requests for reprints to: Bruce Blumberg, Department of Developmental and Cell Biology, University of California Irvine, 2113 McLaugh Hall, Irvine, California 92697-2300. E-mail: blumberg@uci.edu.

This work was supported by grants from the U.S. Environmental Protection Agency (STAR R830686) and National Institutes of Health (GM-60572) (to B.B.); from the Ministries of Education, Culture, Sports, Science and Technology, Environment and Health Labor and Welfare, Japan (to T.I.); and from the University of California Toxic Substance Research and Training Program (UC-37579) (to F.G.).

F.G., H.W., Z.Z., L.M., K.A., R.C., D.M.G., J.K., T.I. have nothing to declare. B.B. is a named inventor on U.S. patents US 5,861,274, US 6,200,802, and US 6,815,168.

### REFERENCES

- Appel KE 2004 Organotin compounds: toxicokinetic aspects. *Drug Metab Rev* 36:763–786
- Golub M, Doherty J 2004 Triphenyltin as a potential human endocrine disruptor. *J Toxicol Environ Health B Crit Rev* 7:281–295
- Blaber SJM 1970 The occurrence of a penis-like outgrowth behind the right tentacle in spent females of *Nucella lapillus*. *Proc Malacolog Soc London* 39:231–233
- Gibbs P, Bryan G 1986 Reproductive failure in populations of the dog-whelk, *Nucella lapillus*, caused by imposex induced by tributyltin from antifouling paints. *J Mar Biol Assoc UK* 66:767–777
- Matthiessen P, Gibbs P 1998 Critical appraisal of the evidence for tributyltin-mediated endocrine disruption in mollusks. *Environ Toxicol Chem* 17:37–43
- Shimasaki Y, Kitano T, Oshima Y, Inoue S, Imada N, Honjo T 2003 Tributyltin causes masculinization in fish. *Environ Toxicol Chem* 22:141–144
- McAllister BG, Kime DE 2003 Early life exposure to environmental levels of the aromatase inhibitor tributyltin causes masculinisation and irreversible sperm damage in zebrafish (*Danio rerio*). *Aquat Toxicol* 65:309–316
- Omura M, Ogata R, Kubo K, Shimasaki Y, Aou S, Oshima Y, Tanaka A, Hirata M, Makita Y, Inoue N 2001 Two-generation reproductive toxicity study of tributyltin chloride in male rats. *Toxicol Sci* 64:224–232
- Ogata R, Omura M, Shimasaki Y, Kubo K, Oshima Y, Aou S, Inoue N 2001 Two-generation reproductive toxicity

- study of tributyltin chloride in female rats. *J Toxicol Environ Health A* 63:127–144
10. Boyer IJ 1989 Toxicity of dibutyltin, tributyltin and other organotin compounds to humans and to experimental animals. *Toxicology* 55:253–298
  11. Heidrich DD, Steckelbroeck S, Klingmuller D 2001 Inhibition of human cytochrome P450 aromatase activity by butyltins. *Steroids* 66:763–769
  12. Cooke GM 2002 Effect of organotins on human aromatase activity in vitro. *Toxicol Lett* 126:121–130
  13. Powers MF, Beavis AD 1991 Triorganotins inhibit the mitochondrial inner membrane anion channel. *J Biol Chem* 266:17250–17256
  14. Gennari A, Viviani B, Galli CL, Marinovich M, Pieters R, Corsini E 2000 Organotins induce apoptosis by disturbance of  $[Ca^{2+}]_i$  and mitochondrial activity, causing oxidative stress and activation of caspases in rat thymocytes. *Toxicol Appl Pharmacol* 169:185–190
  15. Philbert MA, Billingsley ML, Reuhl KR 2000 Mechanisms of injury in the central nervous system. *Toxicol Pathol* 28:43–53
  16. Mu YM, Yanase T, Nishi Y, Waseda N, Oda T, Tanaka A, Takayanagi R, Nawata H 2000 Insulin sensitizer, troglitazone, directly inhibits aromatase activity in human ovarian granulosa cells. *Biochem Biophys Res Commun* 271:710–713
  17. Mu YM, Yanase T, Nishi Y, Takayanagi R, Goto K, Nawata H 2001 Combined treatment with specific ligands for PPAR $\gamma$ :RXR nuclear receptor system markedly inhibits the expression of cytochrome P450arom in human granulosa cancer cells. *Mol Cell Endocrinol* 181:239–248
  18. Saitoh M, Yanase T, Morinaga H, Tanabe M, Mu YM, Nishi Y, Nomura M, Okabe T, Goto K, Takayanagi R, Nawata H 2001 Tributyltin or triphenyltin inhibits aromatase activity in the human granulosa-like tumor cell line KGN. *Biochem Biophys Res Commun* 289:198–204
  19. Nishikawa J, Mamiya S, Kanayama T, Nishikawa T, Shiraiishi F, Horiguchi T 2004 Involvement of the retinoid X receptor in the development of imposex caused by organotins in gastropods. *Environ Sci Technol* 38:6271–6276
  20. Baillie-Hamilton PF 2002 Chemical toxins: a hypothesis to explain the global obesity epidemic. *J Altern Complement Med* 8:185–192
  21. Heindel JJ 2003 Endocrine disruptors and the obesity epidemic. *Toxicol Sci* 76:247–249
  22. Jacobs MN, Lewis DF 2002 Steroid hormone receptors and dietary ligands: a selected review. *Proc Nutr Soc* 61:105–122
  23. Watanabe H, Iguchi T, Morohashi K 2002 [Endocrine disruptors and nuclear receptors]. *Nippon Rinsho* 60:397–403
  24. Kanayama T, Kobayashi N, Mamiya S, Nakanishi T, Nishikawa J 2005 Organotin compounds promote adipocyte differentiation as agonists of the peroxisome proliferator-activated receptor  $\gamma$ /retinoid X receptor pathway. *Mol Pharmacol* 67:766–774
  25. Wang Z, Benoit G, Liu J, Prasad S, Aarnisalo P, Liu X, Xu H, Walker NP, Perlmann T 2003 Structure and function of Nurr1 identifies a class of ligand-independent nuclear receptors. *Nature* 423:555–560
  26. Aarnisalo P, Kim CH, Lee JW, Perlmann T 2002 Defining requirements for heterodimerization between the retinoid X receptor and the orphan nuclear receptor Nurr1. *J Biol Chem* 277:35118–35123
  27. Boehm MF, Zhang L, Zhi L, McClurg MR, Berger E, Wagoner M, Mais DE, Suto CM, Davies JA, Heyman RA, Nadzant AM 1995 Design and synthesis of potent retinoid X receptor selective ligands that induce apoptosis in leukemia cells. *J Med Chem* 38:3146–3155
  28. Yu C, Chen L, Luo H, Chen J, Cheng F, Gui C, Zhang R, Shen J, Chen K, Jiang H, Shen X 2004 Binding analyses between human PPAR $\gamma$ -LBD and ligands. *Eur J Biochem* 271:386–397
  29. Forman BM, Tontonoz P, Chen J, Brun RP, Spiegelman BM, Evans RM 1995 15-Deoxy- $\delta$  12, 14-prostaglandin J2 is a ligand for the adipocyte determination factor PPAR  $\gamma$ . *Cell* 83:803–812
  30. Schoonjans K, Staels B, Auwerx J 1996 The peroxisome proliferator activated receptors (PPARs) and their effects on lipid metabolism and adipocyte differentiation. *Biochim Biophys Acta* 1302:93–109
  31. Kersten S 2002 Peroxisome proliferator activated receptors and obesity. *Eur J Pharmacol* 440:223–234
  32. Lane MD, Tang QQ, Jiang MS 1999 Role of the CCAAT enhancer binding proteins (C/EBPs) in adipocyte differentiation. *Biochem Biophys Res Commun* 266:677–683
  33. Tang QQ, Otto TC, Lane MD 2003 CCAAT/enhancer-binding protein  $\beta$  is required for mitotic clonal expansion during adipogenesis. *Proc Natl Acad Sci USA* 100:850–855
  34. Tang QQ, Lane MD 1999 Activation and centromeric localization of CCAAT/enhancer-binding proteins during the mitotic clonal expansion of adipocyte differentiation. *Genes Dev* 13:2231–2241
  35. Rubin CS, Hirsch A, Fung C, Rosen OM 1978 Development of hormone receptors and hormonal responsiveness in vitro. Insulin receptors and insulin sensitivity in the preadipocyte and adipocyte forms of 3T3-L1 cells. *J Biol Chem* 253:7570–7578
  36. Kletzien RF, Clarke SD, Ulrich RG 1992 Enhancement of adipocyte differentiation by an insulin-sensitizing agent. *Mol Pharmacol* 41:393–398
  37. Kletzien RF, Foellmi LA, Harris PK, Wyse BM, Clarke SD 1992 Adipocyte fatty acid-binding protein: regulation of gene expression in vivo and in vitro by an insulin-sensitizing agent. *Mol Pharmacol* 42:558–562
  38. Tafuri SR 1996 Troglitazone enhances differentiation, basal glucose uptake, and Glut1 protein levels in 3T3-L1 adipocytes. *Endocrinology* 137:4706–4712
  39. Xue JC, Schwarz EJ, Chawla A, Lazar MA 1996 Distinct stages in adipogenesis revealed by retinoid inhibition of differentiation after induction of PPAR $\gamma$ . *Mol Cell Biol* 16:1567–1575
  40. Kawada T, Kamei Y, Sugimoto E 1996 The possibility of active form of vitamins A and D as suppressors on adipocyte development via ligand-dependent transcriptional regulators. *Int J Obes Relat Metab Disord* 20(Suppl 3):S52–S57
  41. Kawada T, Kamei Y, Fujita A, Hida Y, Takahashi N, Sugimoto E, Fushiki T 2000 Carotenoids and retinoids as suppressors on adipocyte differentiation via nuclear receptors. *Biofactors* 13:103–109
  42. Tontonoz P, Graves RA, Budavari AI, Erdjument-Bromage H, Lui M, Hu E, Tempst P, Spiegelman BM 1994 Adipocyte-specific transcription factor ARF6 is a heterodimeric complex of two nuclear hormone receptors, PPAR  $\gamma$  and RXR  $\alpha$ . *Nucleic Acids Res* 22:5628–5634
  43. Martin G, Schoonjans K, Lefebvre AM, Staels B, Auwerx J 1997 Coordinate regulation of the expression of the fatty acid transport protein and acyl-CoA synthetase genes by PPAR $\alpha$  and PPAR $\gamma$  activators. *J Biol Chem* 272:28210–28217
  44. Motojima K, Passilly P, Peters JM, Gonzalez FJ, Latruffe N 1998 Expression of putative fatty acid transporter genes are regulated by peroxisome proliferator-activated receptor  $\alpha$  and  $\gamma$  activators in a tissue- and inducer-specific manner. *J Biol Chem* 273:16710–16714
  45. Frohnert BI, Hui TY, Bernlohr DA 1999 Identification of a functional peroxisome proliferator-responsive element in the murine fatty acid transport protein gene. *J Biol Chem* 274:3970–3977
  46. Martin G, Poirier H, Hennuyer N, Crombie D, Fruchart JC, Heyman RA, Besnard P, Auwerx J 2000 Induction of the fatty acid transport protein 1 and acyl-CoA synthase

- genes by dimer-selective rexinoids suggests that the peroxisome proliferator-activated receptor-retinoid X receptor heterodimer is their molecular target. *J Biol Chem* 275:12612–12618
47. Tontonoz P, Hu E, Devine J, Beale EG, Spiegelman BM 1995 PPAR  $\gamma$  2 regulates adipose expression of the phosphoenolpyruvate carboxykinase gene. *Mol Cell Biol* 15:351–357
  48. Magana MM, Lin SS, Dooley KA, Osborne TF 1997 Sterol regulation of acetyl coenzyme A carboxylase promoter requires two interdependent binding sites for sterol regulatory element binding proteins. *J Lipid Res* 38:1630–1638
  49. Schadinger SE, Bucher NL, Schreiber BM, Farmer SR 2005 PPAR $\gamma$ 2 regulates lipogenesis and lipid accumulation in steatotic hepatocytes. *Am J Physiol Endocrinol Metab* 288:E1195–E1205
  50. Tontonoz P, Kim JB, Graves RA, Spiegelman BM 1993 ADD1: a novel helix-loop-helix transcription factor associated with adipocyte determination and differentiation. *Mol Cell Biol* 13:4753–4759
  51. Kim JB, Spiegelman BM 1996 ADD1/SREBP1 promotes adipocyte differentiation and gene expression linked to fatty acid metabolism. *Genes Dev* 10:1096–1107
  52. Joseph SB, Laffitte BA, Patel PH, Watson MA, Matsuoka KE, Walczak R, Collins JL, Osborne TF, Tontonoz P 2002 Direct and indirect mechanisms for regulation of fatty acid synthase gene expression by liver X receptors. *J Biol Chem* 277:11019–11025
  53. Seo JB, Moon HM, Kim WS, Lee YS, Jeong HW, Yoo EJ, Ham J, Kang H, Park MG, Steffensen KR, Stulnig TM, Gustafsson JA, Park SD, Kim JB 2004 Activated liver X receptors stimulate adipocyte differentiation through induction of peroxisome proliferator-activated receptor  $\gamma$  expression. *Mol Cell Biol* 24:3430–3444
  54. Yu S, Matsusue K, Kashireddy P, Cao WQ, Yeldandi V, Yeldandi AV, Rao MS, Gonzalez FJ, Reddy JK 2003 Adipocyte-specific gene expression and adipogenic steatosis in the mouse liver due to peroxisome proliferator-activated receptor  $\gamma$ 1 (PPAR $\gamma$ 1) overexpression. *J Biol Chem* 278:498–505
  55. Hallakou S, Doare L, Foufelle F, Kergoat M, Guerre-Millo M, Berthault MF, Dugail I, Morin J, Auwerx J, Ferre P 1997 Pioglitazone induces *in vivo* adipocyte differentiation in the obese Zucker fa/fa rat. *Diabetes* 46:1393–1399
  56. de Souza CJ, Eckhardt M, Gagen K, Dong M, Chen W, Laurent D, Burkey BF 2001 Effects of pioglitazone on adipose tissue remodeling within the setting of obesity and insulin resistance. *Diabetes* 50:1863–1871
  57. Smith SR, De Jonge L, Volaufova J, Li Y, Xie H, Bray GA 2005 Effect of pioglitazone on body composition and energy expenditure: a randomized controlled trial. *Metabolism* 54:24–32
  58. Auwerx J 1999 PPAR $\gamma$ , the ultimate thrifty gene. *Diabetologia* 42:1033–1049
  59. Ferre P 2004 The biology of peroxisome proliferator-activated receptors: relationship with lipid metabolism and insulin sensitivity. *Diabetes* 53(Suppl 1):S43–S50
  60. Day C 1999 Thiazolidinediones: a new class of antidiabetic drugs. *Diabet Med* 16:179–192
  61. Mukherjee R, Davies PJ, Crombie DL, Bischoff ED, Cesario RM, Jow L, Hamann LG, Boehm MF, Mondon CE, Nadzan AM, Paterniti Jr JR, Heyman RA 1997 Sensitization of diabetic and obese mice to insulin by retinoid X receptor agonists. *Nature* 386:407–410
  62. Hill JO, Peters JC 1998 Environmental contributions to the obesity epidemic. *Science* 280:1371–1374
  63. Barker DJ, Bull AR, Osmond C, Simmonds SJ 1990 Fetal and placental size and risk of hypertension in adult life. *Br Med J* 301:259–262
  64. Phillips DI, Hirst S, Clark PM, Hales CN, Osmond C 1994 Fetal growth and insulin secretion in adult life. *Diabetologia* 37:592–596
  65. Martyn CN, Barker DJ, Jespersen S, Greenwald S, Osmond C, Berry C 1995 Growth in utero, adult blood pressure, and arterial compliance. *Br Heart J* 73:116–121
  66. Yajnik C 2000 Interactions of perturbations in intrauterine growth and growth during childhood on the risk of adult-onset disease. *Proc Nutr Soc* 59:257–265
  67. Barker DJ, Martyn CN, Osmond C, Hales CN, Fall CH 1993 Growth in utero and serum cholesterol concentrations in adult life. *Br Med J* 307:1524–1527
  68. Lucas A 1998 Programming by early nutrition: an experimental approach. *J Nutr* 128:401S–406S
  69. Armitage JA, Khan IY, Taylor PD, Nathanielsz PW, Poston L 2004 Developmental programming of metabolic syndrome by maternal nutritional imbalance; how strong is the evidence from experimental models in mammals? *J Physiol* 561:355–377
  70. Masuno H, Kidani T, Sekiya K, Sakayama K, Shiosaka T, Yamamoto H, Honda K 2002 Bisphenol A in combination with insulin can accelerate the conversion of 3T3-L1 fibroblasts to adipocytes. *J Lipid Res* 43:676–684
  71. Masuno H, Okamoto S, Iwanami J, Honda K, Shiosaka T, Kidani T, Sakayama K, Yamamoto H 2003 Effect of 4-nonylphenol on cell proliferation and adipocyte formation in cultures of fully differentiated 3T3-L1 cells. *Toxicol Sci* 75:314–320
  72. Toschke AM, Koletzko B, Slikker Jr W, Hermann M, von Kries R 2002 Childhood obesity is associated with maternal smoking in pregnancy. *Eur J Pediatr* 161:445–448
  73. von Kries R, Toschke AM, Koletzko B, Slikker Jr W 2002 Maternal smoking during pregnancy and childhood obesity. *Am J Epidemiol* 156:954–961
  74. Oken E, Huh SY, Taveras EM, Rich-Edwards JW, Gillman MW 2005 Associations of maternal prenatal smoking with child adiposity and blood pressure. *Obes Res* 13:2021–2028
  75. Power C, Jefferis BJ 2002 Fetal environment and subsequent obesity: a study of maternal smoking. *Int J Epidemiol* 31:413–419
  76. Hill SY, Shen S, Locke Wellman J, Rickin E, Lowers L 2005 Offspring from families at high risk for alcohol dependence: increased body mass index in association with prenatal exposure to cigarettes but not alcohol. *Psychiatry Res* 135:203–216
  77. Umesono K, Murakami KK, Thompson CC, Evans RM 1991 Direct repeats as selective response elements for the thyroid hormone, retinoic acid, and vitamin D3 receptors. *Cell* 65:1255–1266
  78. Perlmann T, Rangarajan PN, Umesono K, Evans RM 1993 Determinants for selective RAR and TR recognition of direct repeat HREs. *Genes Dev* 7:1411–1422
  79. Blumberg B, Mangelsdorf DJ, Dyck JA, Bittner DA, Evans RM, De Robertis EM 1992 Multiple retinoid-responsive receptors in a single cell: families of retinoid “X” receptors and retinoic acid receptors in the *Xenopus* egg. *Proc Natl Acad Sci USA* 89:2321–2325
  80. Blumberg B, Bolado J Jr., Derguini F, Craig AG, Moreno TA, Chakravarti D, Heyman RA, Buck J, Evans RM 1996 Novel retinoic acid receptor ligands in *Xenopus* embryos. *Proc Natl Acad Sci USA* 93:4873–4878
  81. Blumberg B, Sabbagh Jr W, Juguilon H, Bolado Jr J, van Meter CM, Ong ES, Evans RM 1998 SXR, a novel steroid and xenobiotic-sensing nuclear receptor. *Genes Dev* 12:3195–3205
  82. Tabb MM, Sun A, Zhou C, Grun F, Errandi J, Romero K, Pham H, Inoue S, Mallick S, Lin M, Forman BM, Blumberg B 2003 Vitamin K2 regulation of bone homeostasis is mediated by the steroid and xenobiotic receptor SXR. *J Biol Chem* 278:43919–43927
  83. Grun F, Blumberg B 2003 Identification of novel nuclear hormone receptor ligands by activity-guided purification. *Methods Enzymol* 364:3–24
  84. Grun F, Venkatesan RN, Tabb MM, Zhou C, Cao J, Hemmati D, Blumberg B 2002 Benzoate X receptors  $\alpha$

- and  $\beta$  are pharmacologically distinct and do not function as xenobiotic receptors. *J Biol Chem* 277:43691–43697
85. Livak KJ, Schmittgen TD 2001 Analysis of relative gene expression data using real-time quantitative PCR and the  $2^{-\Delta\Delta C(T)}$  method. *Methods* 25:402–408
86. Bourguet W, Ruff M, Chambon P, Gronemeyer H, Moras D 1995 Crystal structure of the ligand-binding domain of the human nuclear receptor RXR- $\alpha$ . *Nature* 375:377–382
87. Allegretto EA, McClurg MR, Lazarchik SB, Clemm DL, Kerner SA, Elgort MG, Boehm MF, White SK, Pike JW, Heyman RA 1993 Transactivation properties of retinoic acid and retinoid X receptors in mammalian cells and yeast. Correlation with hormone binding and effects of metabolism. *J Biol Chem* 268:26625–26633
88. Lehmann JM, Moore LB, Smith-Oliver TA, Wilkison WO, Willson TM, Kliewer SA 1995 An antidiabetic thiazolidinedione is a high affinity ligand for peroxisome proliferator-activated receptor  $\gamma$  (PPAR  $\gamma$ ). *J Biol Chem* 270:12953–12956
89. Nieuwkoop P, Faber J 1994 Normal table of *Xenopus laevis* (Daudin). 2nd ed. New York: Garland Publishing, Inc.
90. Rugh R 1962 Experimental embryology: techniques and procedures. 3rd ed. Minneapolis: Burgess Publishing Co.

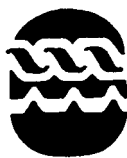

*Molecular Endocrinology* is published monthly by The Endocrine Society (<http://www.endo-society.org>), the foremost professional society serving the endocrine community.
